# Supplementary material for: Cancer cells produce liver metastasis via gap formation in sinusoidal endothelial cells through proinflammatory paracrine mechanisms
Source: PubMed Central journal article supplement — Sci Adv. 2022 Sep 28;8(39):eabo5525. doi: 10.1126/sciadv.abo5525 (PMC9519040; doi:10.1126/sciadv.abo5525), 2022-09-28
Supplement: sciadv.abo5525_sm.pdf [file sciadv.abo5525_sm.pdf]

Supplementary Materials for  
**Cancer cells produce liver metastasis via gap formation in sinusoidal  
endothelial cells through proinflammatory paracrine mechanisms**

Truong Huu Hoang *et al.*

Corresponding author: Norifumi Kawada, kawadanori@omu.ac.jp

*Sci. Adv.* **8**, eabo5525 (2022)  
DOI: 10.1126/sciadv.abo5525

**The PDF file includes:**

Supplementary Methods  
Figs. S1 to S7  
Tables S1 to S6  
Legends for data S1 to S3

**Other Supplementary Material for this manuscript includes the following:**

Movies S1 and S2  
Data S1 to S3

## Methods

### Immunofluorescence staining

Primary LSECs were plated onto 12 mm micro cover glass in the bottom of each well of a 24 well-plate. The cells were washed twice for 5 min with PBS and fixed with 4% paraformaldehyde solution for 30 min at room temperature. The cells were permeabilized with 0.25% Triton X-100 in PBS at room temperature for 10 min, blocked with 10% BSA in PBS for 1 h at room temperature, incubated with primary antibodies (list of antibodies in **table S5**) diluted in blocking solution overnight at 4°C, and then incubated with secondary antibody at room temperature for 1 h. The cells were carefully rinsed three times with PBS between each step. The cover glasses were mounted in ProLong Gold Antifade reagent (Thermo Fisher Scientific, Invitrogen).

### Primary mouse LSECs and hepatocyte isolation

Primary mouse LSECs and hepatocytes were isolated in our laboratory from C57BL/6J mice using a modified version of a previously published protocol. Briefly, normal livers were perfused for 5 min with SC-1 solution consisting of 8,000 mg/l NaCl; 400 mg/l KCl; 88.17 mg/l NaH<sub>2</sub>PO<sub>4</sub> · 2H<sub>2</sub>O; 120.45 mg/l Na<sub>2</sub>HPO<sub>4</sub>; 2,380 mg/l HEPES; 350 mg/l NaHCO<sub>3</sub>; 190 mg/l EGTA; and 900 mg/l glucose (pH 7.3). The livers were then digested at 42°C for 5 min with 0.2% collagenase (Fujifilm Wako) and 0.056% CaCl<sub>2</sub> dissolved in SC-2 solution consisting of 8,000 mg/l NaCl; 400 mg/l KCl; 88.17 mg/l NaH<sub>2</sub>PO<sub>4</sub> · 2H<sub>2</sub>O; 120.45 mg/l Na<sub>2</sub>HPO<sub>4</sub>; 2,380 mg/l HEPES; 350 mg/l NaHCO<sub>3</sub>; and 560 mg/l CaCl<sub>2</sub>·2H<sub>2</sub>O (pH 7.3). The digested livers were then suspended in SC-1 solution. The resulting suspension was filtered through a 70 µm nylon cell strainer (Corning, Glendale, AZ, USA) and then centrifuged at 100 × g and 4°C for 5 min, which produced an LSEC-enriched fraction in the supernatant and a hepatocyte fraction in the pellet. To collect hepatocytes, we suspended the pellet in 5.5 ml DF-10, gently pipetted the suspension, and then added 4.5 ml Percoll solution (Cytiva) and softly inverted the tube. The suspension was centrifuged at 1,000 rpm and 4°C for 10 min, and the resulting pellet was then washed once with DF-10. The LSEC-enriched supernatant was transferred to a new tube and incubated at room temperature for 5 min to precipitate contaminating hepatocytes at the bottom of the tube. The LSECs were pelleted by centrifugation at 2,500 rpm and 4°C for 10 min and then suspended in 3 ml DF-10. The resulting cell suspension was subjected to isopycnic centrifugation with Percoll solution to produce gradients (50%, 25% in SC-1 solution). The LSECs were separated from Kupffer cells by placing the supernatant in

a polystyrene petri dish and incubating the dish in a humidified tissue culture incubator at 37°C for 8 min, during which the Kupffer cells attached to the plate. The medium was then collected and centrifuged at 2,500 rpm and 4°C for 10 min to enrich the LSECs in the pellet. Red blood cells that accompanied the LSECs in the pellet were removed by pipetting with a blood-cell removal medium consisting of KHCO<sub>3</sub> 10 mM, NH<sub>4</sub>Cl 155 mM, and EDTA 0.1 mM, followed by incubation on ice for 5 min. Finally, the LSECs were extracted by centrifugation at 2,500 rpm and 4°C for 10 min and suspended using an EGM<sup>TM</sup>-2 MV Microvascular Endothelial Cell Growth Medium-2 SingleQuots<sup>TM</sup> kit (LSEC medium, Lonza, Basel, Switzerland).

### **Western blot analyses**

Conditioned medium collected from LSECs and Hepa1-6 cells in mono-culture, direct co-culture, or indirect co-culture using inserts was conducted similar as shown in zymography assay. Cells were lysed in radioimmunoprecipitation buffer containing protease inhibitors (Sigma-Aldrich) and phosphatase inhibitors (Sigma-Aldrich). Cellular protein samples 7 (1-3 µg) were separated by 5–20% SDS-polyacrylamide gel electrophoresis (PAGE, (DRC, Tokyo, Japan) using Precision Plus Protein<sup>TM</sup> Dual Colour standards (Bio-Rad, Hercules, CA, USA) and transferred to 0.45 µm polyvinylidene difluoride membranes (Sartorius, Göttingen, Germany). After blocking with 5% skim milk, the membranes were incubated with the primary antibodies overnight at 4°C (**table S5**). The membranes were then labeled with horseradish peroxidase-conjugated goat anti-mouse or anti-rabbit secondary antibodies (1:2,000, Dako, Agilent Technologies, Santa Clara, CA, USA). Immunoreactive bands were visualized by enhanced chemiluminescence using L-012 substrate (ImmunoStar LD, Fujifilm Wako) and documented with a Fujifilm Image Reader LAS-3000 (Fujifilm, Tokyo, Japan) coupled to image analysis software (Multi-Gauge, Fujifilm). GAPDH was used as the loading control. ImageJ was used to evaluate the band intensities for western blot analysis (NIH).

### **Quantitative RT-PCR**

Total RNA was extracted from cells using TRIzol reagent (Thermo Fisher Scientific) and the Direct-zol<sup>TM</sup> RNA miniPrep kit (Zymo Research, Irvine, CA, USA). The extracted

RNAs were quantified using a NanoDrop™ 2000c Spectrophotometer (Thermo Fischer Scientific). SuperScript™ III Reverse Transcriptase (Thermo Fisher Scientific) was then used to generate cDNA. Quantitative RT-PCR assays were performed using SsoAdvanced™ Universal SYBR® Green Supermix (Bio-Rad) and the CFX96 Real-time PCR detection system (Bio-Rad) with the primers described in **table S6**. The relative expression levels were normalized to *18s* or *Gapdh* RNA expression, and fold expression changes were calculated using the  $2^{-\Delta\Delta CT}$  method.

### **Sirius red staining**

Tissue sections were stained with 0.1% (w/v) Sirius Red (Direct Red 80; Sigma-Aldrich) in a saturated aqueous picric acid solution for 1 h at room temperature to visualize collagen fibres. After staining, the sections were washed twice in 0.01 N HCl and mounted with NEW MX (Matsunami Glass) [2]. Images were captured using a BZ-X700-All-in-One fluorescence microscope (Keyence Co., Osaka, Japan).

### **Cytokine array**

Following incubation with a detection antibody cocktail, antibody conjugation, and recommended washes, immunoblots were developed with a chemiluminescent substrate reagent kit (Fujifilm Wako), and signal was obtained using a Fusion Solo S machine (VILBER, Marne-la-Vallée Cedex 3, France). In the next step, spot findings were used to determine signal and background intensities using ImageJ software. For background correction, median background intensities were subtracted from mean signal intensities. To further calculate the differential expression, the mean signal intensity of the cytokine/chemokine spots on the co-culture membrane was divided by the mean signal intensity of the spot on the control membrane.

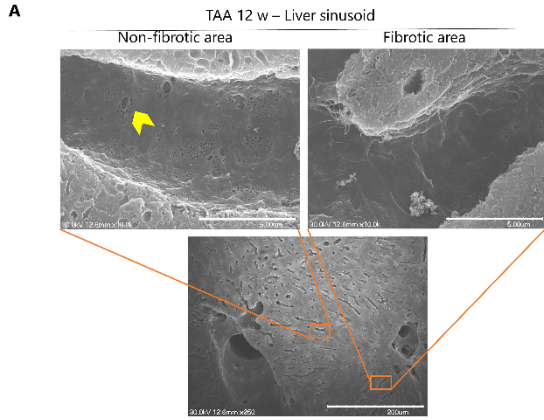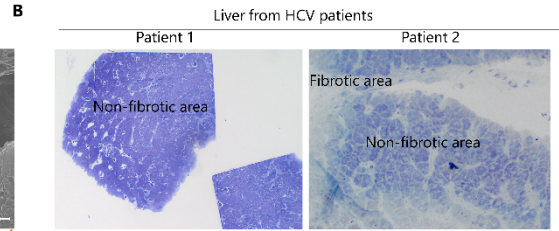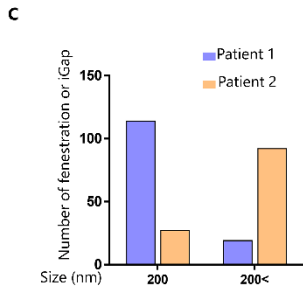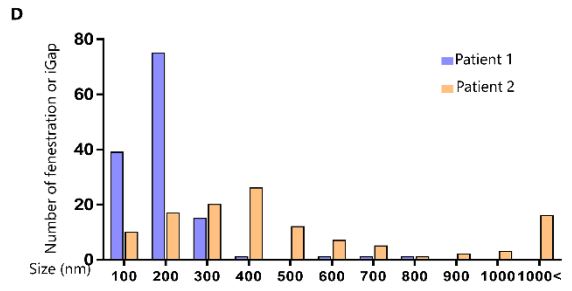

**Fig. S1: iGap formation in fibrotic liver in mice and human.**

(A) Representative SEM images of liver sinusoid from mice after 12 weeks of TAA treatment to induce liver fibrosis. Defenestration is present in the fibrotic area (left), and iGap (yellow arrowhead) is present in the non-fibrotic area (right). (B) Representative images with trypan blue staining of liver biopsy specimens from two patients with HCV infection. (C, D) Quantification of fenestration and iGap in two patients (C) and the numbers of fenestrations or iGap with the indicated diameters (D).

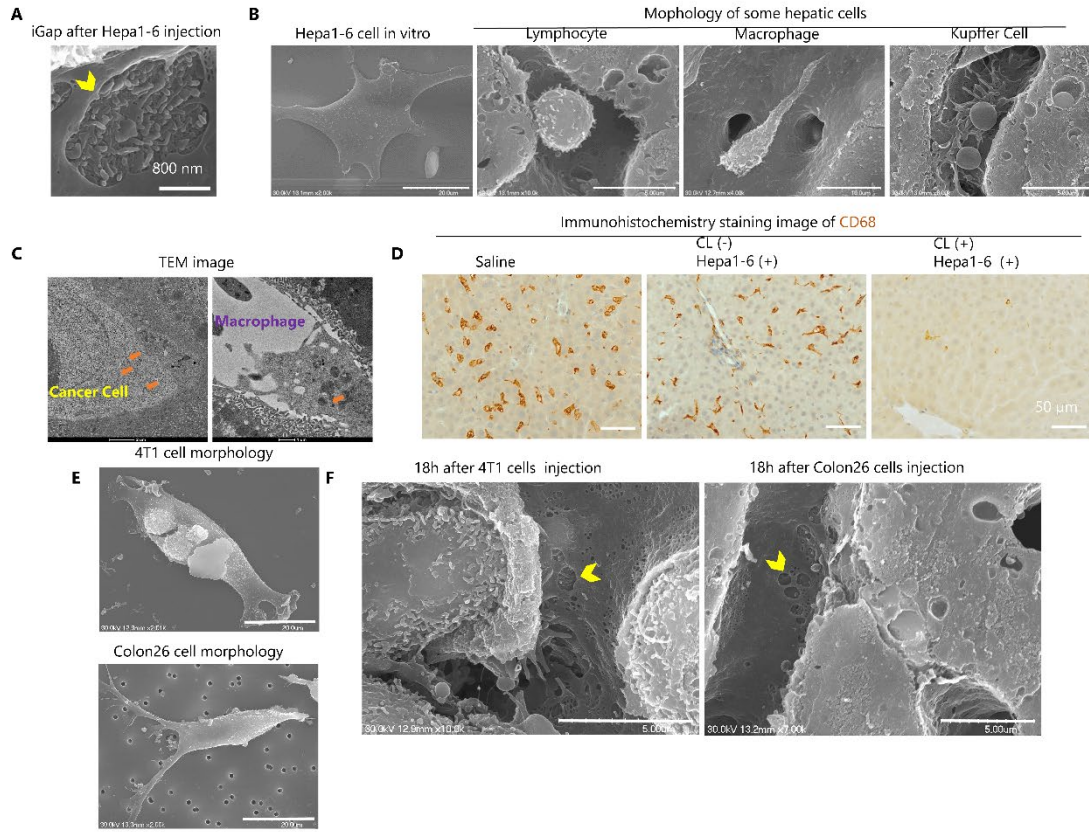

**Fig. S2: Morphological SEM images of cancer cells and hepatic cells.**

(A) Representative SEM images of iGap in LSECs 18 h after Hepa1-6 intrasplenic injection. Scale bar, 800 nm. (B) Representative SEM images of a Hepa1-6 cell *in vitro* and a lymphocyte, a macrophage, and a Kupffer cell *in vivo*. Scale bars from left to right are 20  $\mu\text{m}$ , 5  $\mu\text{m}$ , 10  $\mu\text{m}$ , and 5  $\mu\text{m}$ . (C) Representative TEM images of a Hepa1-6 cell (left) and a macrophage (right). Orange arrows indicate mitochondria of the cell. (D) Representative IHC images of CD68 staining, a marker of macrophages, in liver tissue 1 day after saline or Hepa1-6 cell injection with or without intravenous CL. (E) Morphology of a 4T1 breast cancer cell (upper) and a Colon 26 colon cancer cell (lower) in SEM images. Scale bar, 20  $\mu\text{m}$ . (F) Representative SEM images of iGap (yellow arrowhead) in liver sinusoid 16 h after 4T1 cell (left) and Colon26 cell (right) intrasplenic injection. Scale bar, 5  $\mu\text{m}$ .

**Movie S1 and S2: 3D-RT video of the interaction between Hepa1-6 cells (yellow) and LSECs (blue) *in vivo*.** Interaction between the cancer cell and LSEC (S1). Cancer cell breaks through the LSEC wall (S2).



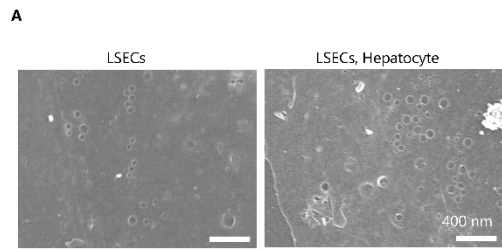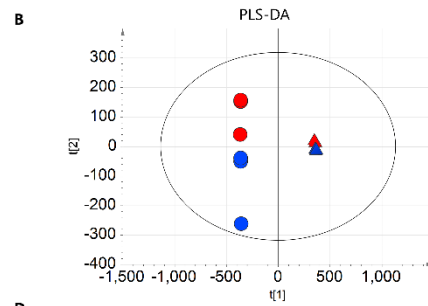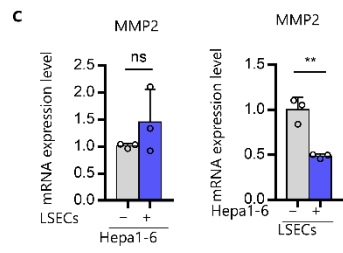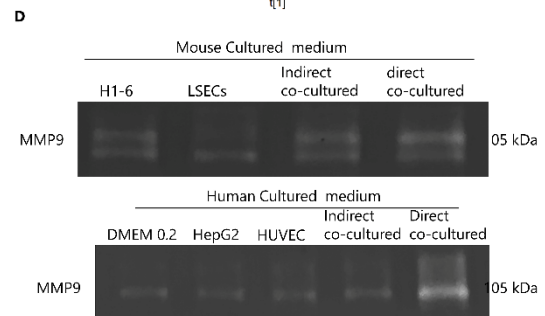

**Fig. S3: MMPs activity in cell-cell interaction.**

(A) Representative SEM images of iGap in LSECs after 24 h of mono-culture or co-culture with hepatocytes. Scale bars, 400 nm. (B) Partial least squares-discriminant analysis (PLS-DA) score plot using FPKM values for 13,525 genes shows the segregation of gene clusters between co-cultured and mono-cultured LSECs. Red, co-cultured; blue, mono-cultured; circle LSECs; triangle, Hepa1-6 cells. (C) Validation of MMP2 mRNA expression by qRT-PCR in Hepa1-6 cells (left) and LSECs (right). (D) Gelatin zymography for MMP9 activity in conditioned medium from Hepa1-6 cell and LSEC mono-cultures, Hepa1-6 cell/LSEC indirect (*via* insert) and direct co-cultures (upper blot), HepG2 cell and HUVEC mono-cultures, and HepG2/HUVEC indirect (*via* insert) and direct co-cultures (lower blot). Data are from three independent experiments performed in triplicate and presented as mean values  $\pm$  s.d.; ns, not significant; \*\*  $P < 0.01$ , based on two-tailed unpaired Student's *t*-test for panel C.

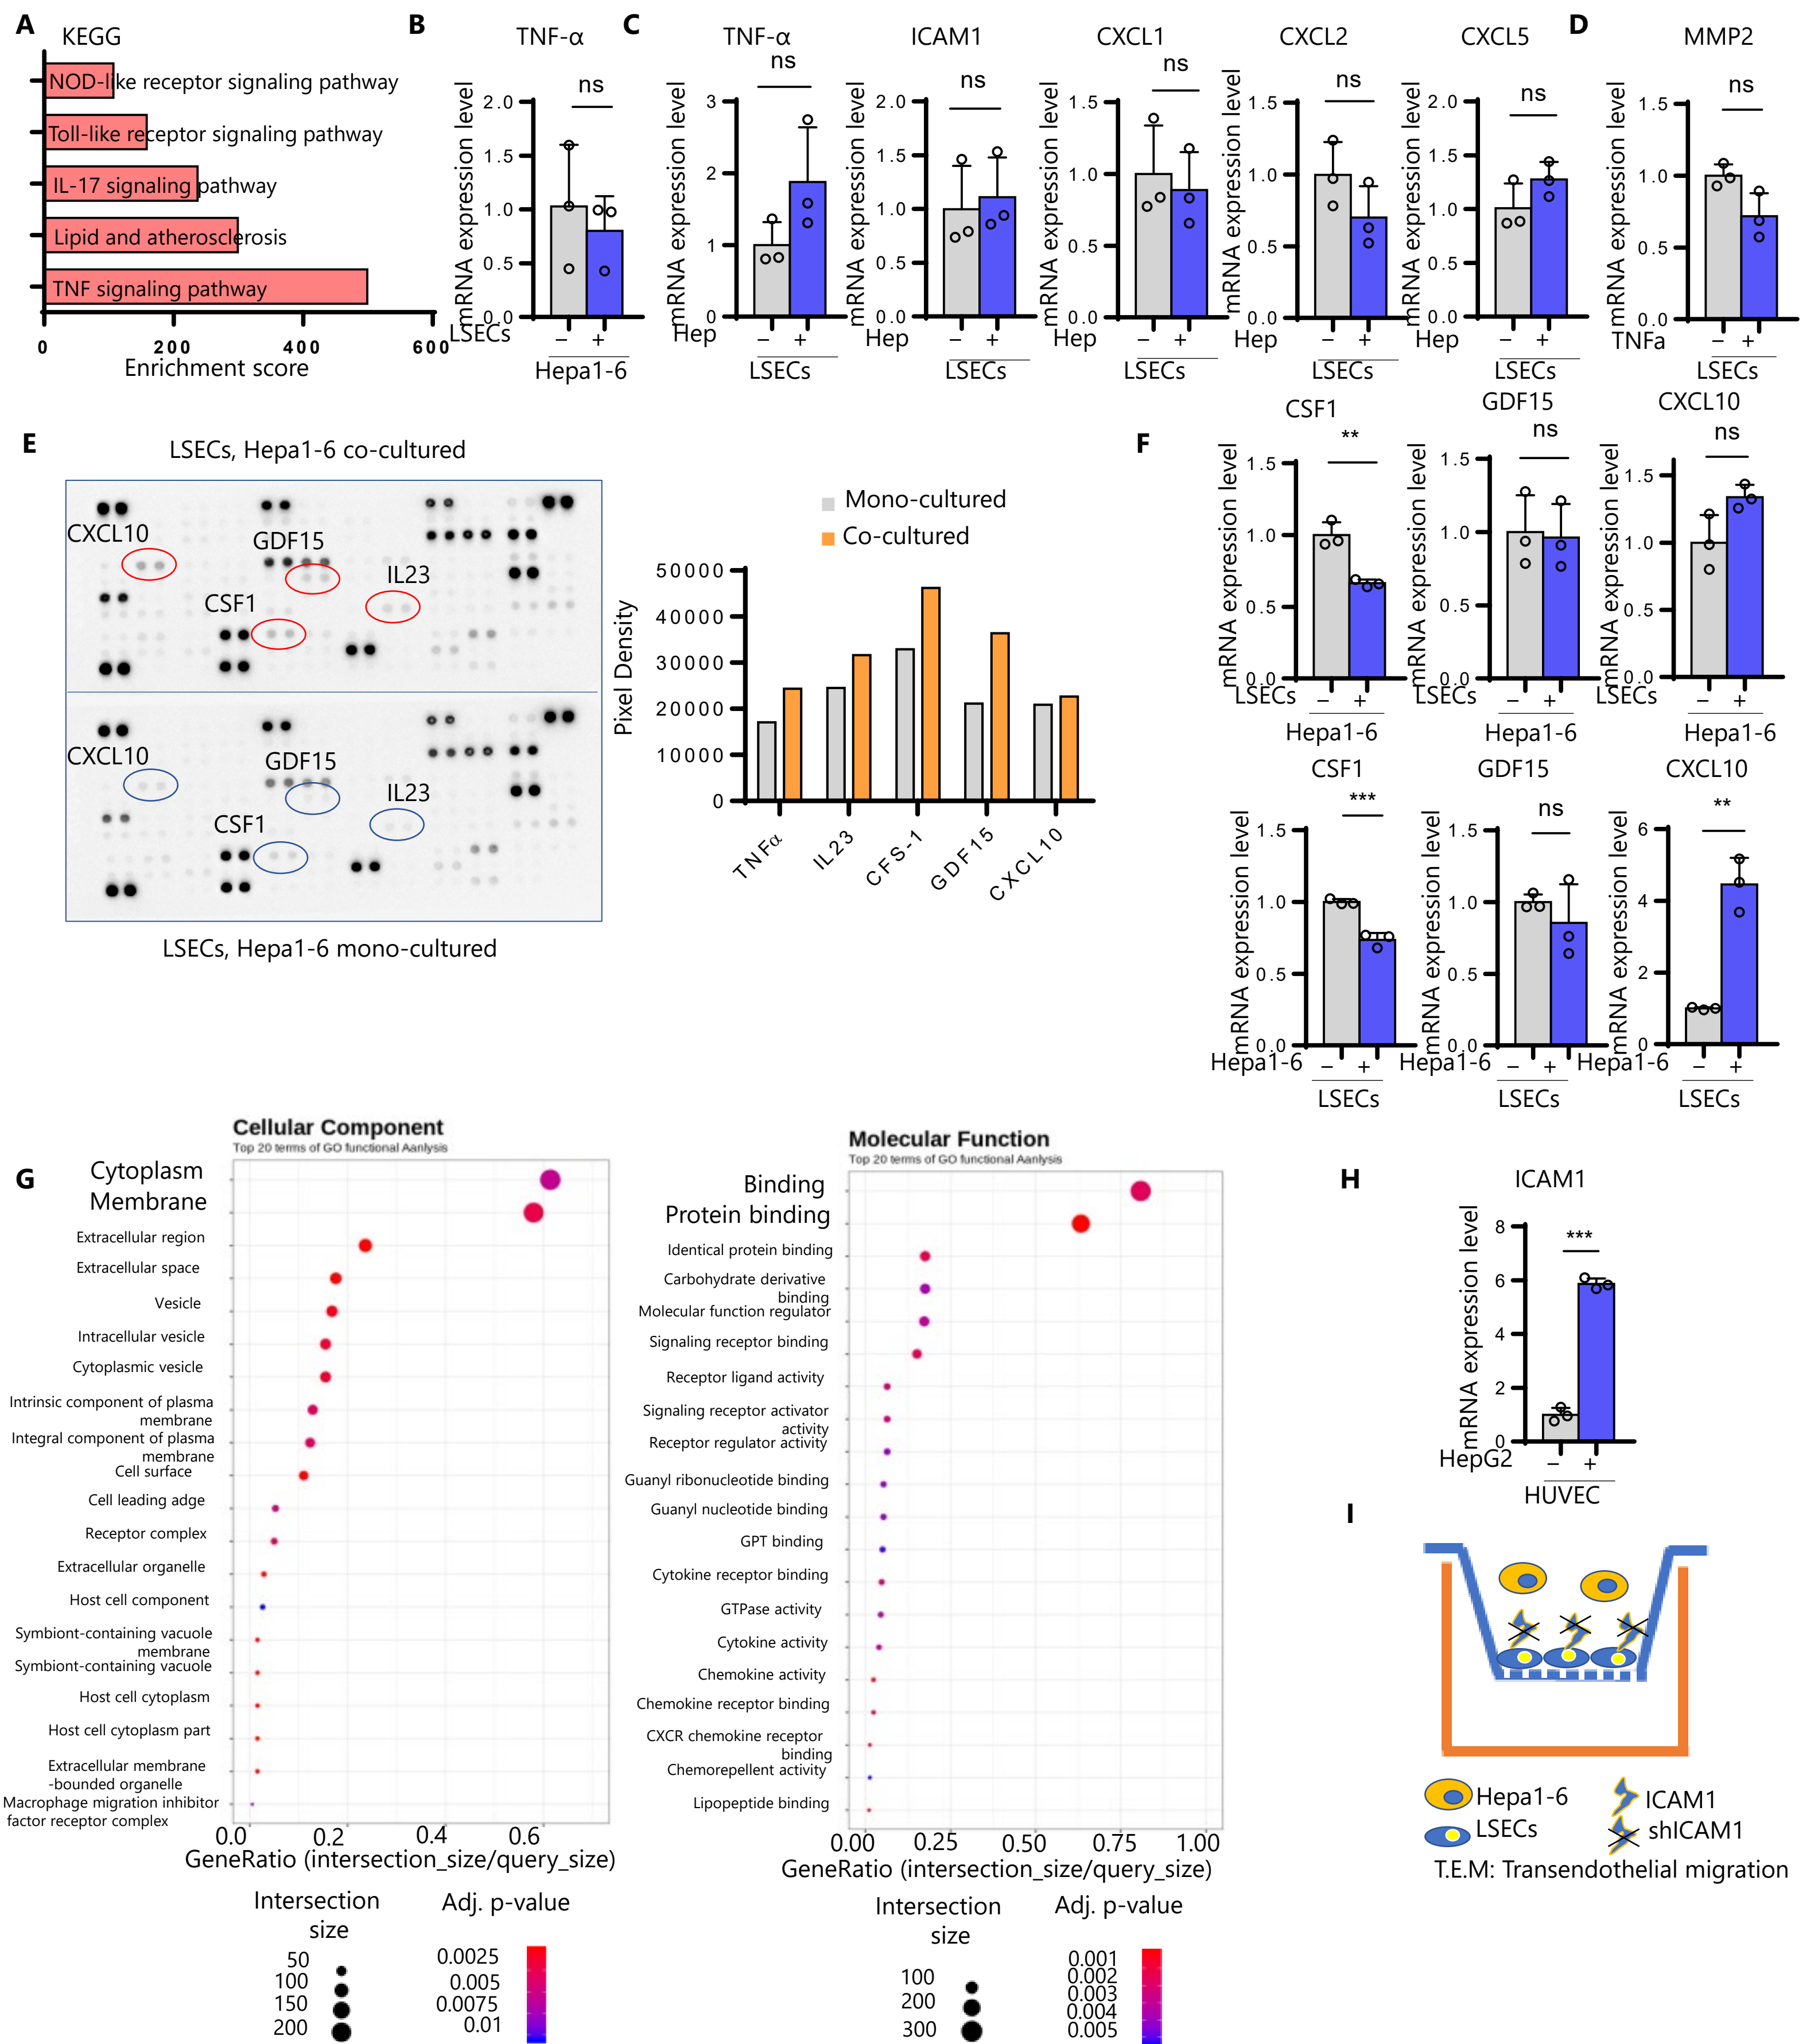

**Fig. S4: Validation of TNF- $\alpha$  signal in iGap formation in LSECs.**

(A) RNA-seq analysis of differentially upregulated genes in LSECs based on the Enrichr NCI-Nature pathway database for KEGG 2020. (B) Validation of *Tnf- $\alpha$*  mRNA expression by qRT-PCR in Hepa1-6 cells. (C) Validation by qRT-PCR of expression of *Tnf- $\alpha$*  and its signaling pathway-related genes *Mmp9*, *ICam1*, *Cxcl2*, *Cxcl5*, and *Cxcl1* in LSECs co-cultured with hepatocytes (Hep). (D) Validation of *Mmp2* mRNA expression by qRT-PCR in LSECs after treatment with 10 ng/ml TNF- $\alpha$  for 24 h. (E) Re-confirm cytokine array for soluble factors (circled) TNF- $\alpha$ , IL23, CSF1, GDF15, and CXCL10 in combined media from mono-cultured LSECs and Hepa1-6 cells and in medium from co-cultured LSECs and Hepa1-6 cells. The bottom graph shows the pixel density with grey and orange colors indicated to mono- and co-cultured, respectively. (F) Validation by qRT-PCR of mRNA expression of *Cfs1*, *Gdf15*, and *Cxcl10* in LSECs and Hepa1-6 cells under co-culture conditions. (G) GO terms related to cellular components and molecular functions for DEGs in LSECs co-cultured with Hepa1-6 cells. (H) Validation of *ICAM1* mRNA expression by qRT-PCR in HUVEC under co-cultured with HepG2 for 24 h. (I) Diagram of TEM with Hepa1-6 cells seeded on top of transwell inserts coated with shGFP-LSECs or shICAM1-LSECs. All data are from three independent experiments performed in triplicate and presented as mean values  $\pm$  s.d., ns, not significant; \*  $P < 0.05$ , \*\*  $P < 0.01$ , and \*\*\*  $P < 0.001$  based on two-tailed unpaired Student's *t*-test for panels B, C, and E.

**A**

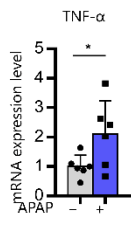

**Fig. S5: *Tnf- $\alpha$*  mRNA expression was upregulated 6 h after APAP injection.**

(A) The validation of mRNA expression of *Tnf- $\alpha$*  by qRT-PCR analysis in liver tissues under treatment with or without 300 mg/kg of body weight APAP dose for 6 h. Data were quantified from n = 6 mice in each group; two-sided *t-test*, mean values  $\pm$  s.d., \*  $P < 0.05$ .

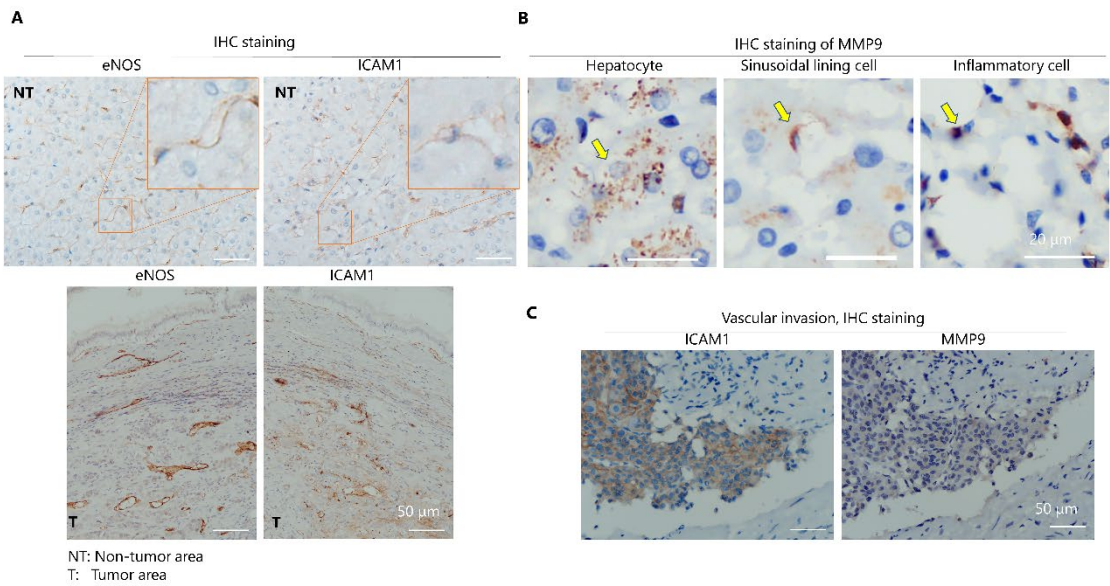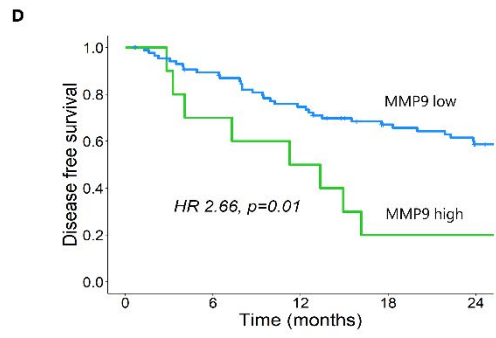

**Fig. S6: MMP9 and ICAM1 expression in patients with HCC.**

(A) Representative images of ICAM1 and eNOS staining in HCC specimens, in tumoral and non-tumoral areas. Scale bar, 50  $\mu\text{m}$ . (B) Representative images of MMP9 staining in hepatocytes (left), inflammatory cells in the portal tract (right), and sinusoidal lumen (middle) in human liver. Scale bar, 20  $\mu\text{m}$ . (C) Representative images of ICAM1 and MMP9 staining in vascular invasion. Scale bar, 50  $\mu\text{m}$ . (D) Kaplan–Meier curves show the association between low and high MMP9 staining levels and disease-free survival.



**A**

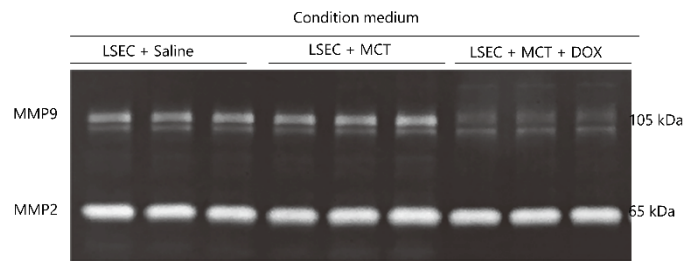

**Fig. S7: MMPs activity under treatment of MCT, DOX in LSECs.**

**(A)** Gelatin zymography to detect MMP9 activity in conditioned medium from LSECs after 4 h of treatment with saline, MCT, or MCT-DOX combination.

## **Supplementary Tables**

**Table S1: Univariate and multivariate logistic regression analyses of factors were used to differentiate between patients with and those without vascular invasion.**

| Variable         |                         | univariate |            |                | multivariate 1 |            |                | multivariate 2 |            |                |
|------------------|-------------------------|------------|------------|----------------|----------------|------------|----------------|----------------|------------|----------------|
|                  |                         | OR         | 95%CI      | <i>P</i> value | OR             | 95%CI      | <i>P</i> value | OR             | 95%CI      | <i>P</i> value |
| ICAM1            | high                    | 4.67       | 1.67–13.01 | 0.003**        | 3.36           | 1.13–10.00 | 0.03*          |                |            |                |
| MMP9             | high                    | 4.38       | 0.88–21.81 | 0.07           |                |            |                |                |            |                |
| ICAM1 or MMP9    | high                    | 4.62       | 1.80–11.82 | 0.001**        |                |            |                | 4.31           | 1.57–11.80 | 0.005**        |
| Age              | per 10 years            | 0.98       | 0.93–1.04  | 0.52           |                |            |                |                |            |                |
| Sex              | Male                    | 1.17       | 0.48–2.85  | 0.73           |                |            |                |                |            |                |
| Child-Pugh score | per 1                   | 3.25       | 1.12–9.44  | 0.03*          | 2.28           | 0.76–6.90  | 0.14           | 2.43           | 0.79–7.47  | 0.12           |
| ALBI score       | per 1                   | 1.74       | 0.65–4.63  | 0.27           |                |            |                |                |            |                |
| AFP              | per 100 ng/ml           | 1.01       | 1.00–1.02  | 0.14           |                |            |                |                |            |                |
| Size of tumor    | per 1 cm                | 1.26       | 1.07–1.47  | 0.004**        | 1.22           | 1.03–1.43  | 0.02*          | 1.25           | 1.05–1.48  | 0.01*          |
| Number of tumors | per 1                   | 1.59       | 0.85–2.98  | 0.15           |                |            |                |                |            |                |
| Fibrosis         | cirrhosis               | 0.67       | 0.26–1.72  | 0.41           |                |            |                |                |            |                |
| BMI              | per 1 kg/m <sup>2</sup> | 0.94       | 0.85–1.05  | 0.27           |                |            |                |                |            |                |

\*  $P < 0.05$ , \*\*  $P < 0.01$ , \*\*\*  $P < 0.001$

Variables in multivariate 1 analysis included ICAM1, Child-Pugh score, and size of tumor, and those in multivariate 2 included ICAM1 or MMP9, Child-Pugh score, and size of tumor. Abbreviation: OR, odds ratio; CI, confidence interval; ALBI score, Albumin-Bilirubin score; AFP,  $\alpha$ -fetoprotein; BMI, body mass index.

**Table S2: Univariate and multivariate Cox regression analyses for survival.**

| Variable          | univariate              |                  | multivariate 1 |                  | multivariate 2 |                  |       |
|-------------------|-------------------------|------------------|----------------|------------------|----------------|------------------|-------|
|                   | HR (95%CI)              | <i>P</i> value   | HR (95%CI)     | <i>P</i> value   | HR (95%CI)     | <i>P</i> value   |       |
| ICAM1             | high                    | 2.65 (1.15–6.12) | 0.02*          | 2.29 (0.97–5.43) | 0.06           | 2.46 (1.04–5.81) | 0.04* |
| MMP9              | high                    | 1.73 (0.58–5.13) | 0.33           |                  |                |                  |       |
| ICAM1 or MMP9     | high                    | 2.70 (1.15–6.33) | 0.02*          | 1.66 (0.86–3.21) | 0.13           | 1.75 (0.92–3.33) | 0.08  |
| Age               | per 10 years            | 1.63 (0.87–3.06) | 0.13           |                  |                |                  |       |
| Sex               | Male                    | 0.58 (0.24–1.38) | 0.22           |                  |                |                  |       |
| Child-Pugh score  | per 1                   | 1.92 (1.04–3.56) | 0.04*          |                  |                |                  |       |
| ALBI score        | per 1                   | 2.20 (0.87–5.55) | 0.10           |                  |                |                  |       |
| AFP               | per 100 ng/ml           | 1.00 (0.99–1.00) | 0.51           |                  |                |                  |       |
| Size of tumor     | per 1 cm                | 1.05 (0.97–1.15) | 0.23           |                  |                |                  |       |
| Number of tumors  | per 1                   | 1.30 (0.80–2.11) | 0.29           |                  |                |                  |       |
| Vascular invasion | with invasion           | 1.99 (0.77–5.19) | 0.16           |                  |                |                  |       |
| Fibrosis          | cirrhosis               | 1.59 (0.65–3.91) | 0.31           |                  |                |                  |       |
| BMI               | per 1 kg/m <sup>2</sup> | 0.96 (0.85–1.07) | 0.46           |                  |                |                  |       |

Variables in multivariate 1 analysis included ICAM1 and Child-Pugh score, and those in multivariate 2 included ICAM1 or MMP9 and Child-Pugh score.

Abbreviation: HR, hazard ratio.

**Table S3: Baseline characteristics of the patients with HCC.**

| Variable                 | Without vascular invasion<br>N = 48 | With vascular invasion<br>N = 50 | <i>P</i> value |
|--------------------------|-------------------------------------|----------------------------------|----------------|
| Age (y)                  | 71 [67, 77]                         | 72 [67, 75]                      | 0.94           |
| Sex                      |                                     |                                  |                |
| Male                     | 34 (70.8)                           | 37 (74.0)                        | 0.73           |
| Female                   | 14 (29.2)                           | 13 (26.0)                        |                |
| BMI (kg/m <sup>2</sup> ) | 25.0 [22.2, 26.6]                   | 23.2 [20.7, 24.9]                | 0.08           |
| Child-Pugh score         |                                     |                                  |                |
| 5                        | 44 (91.7)                           | 38 (76.0)                        | 0.06           |
| 6                        | 4 (8.3)                             | 8 (16.0)                         |                |
| 7                        | 0 (0.0)                             | 4 (8.0)                          |                |
| ALBI score               | -2.77 [-2.96, -2.59]                | -2.78 [-3.03, -2.39]             | 0.48           |
| AFP (ng/mL)              | 8.8 [3.9, 66.1]                     | 24.3 [4.5, 555.5]                | 0.10           |
| Size of tumor (cm)       | 2.5 [2.0, 4.1]                      | 4.7 [2.5, 7.2]                   | 0.001**        |
| Number of tumors         | 1.0 [1.0, 1.0]                      | 1.0 [1.0, 2.0]                   | 0.22           |
| Fibrosis                 |                                     |                                  |                |
| Non-cirrhosis            | 35 (72.9)                           | 40 (80.0)                        | 0.41           |
| Cirrhosis                | 13 (27.1)                           | 10 (20.0)                        |                |

Values are reported as N (%) or median [interquartile ranges].

**Table S4: Univariate and multivariate Cox regression analyses for recurrence.**

| Variable          |                         | univariate       |                | multivariate 2   |                |
|-------------------|-------------------------|------------------|----------------|------------------|----------------|
|                   |                         | HR (95%CI)       | <i>P</i> value | HR (95%CI)       | <i>P</i> value |
| ICAM1             | high                    | 1.40 (0.74–2.63) | 0.30           |                  |                |
| MMP9              | high                    | 2.66 (1.23–5.74) | 0.01*          | 2.51 (1.11–5.68) | 0.03*          |
| ICAM1 or MMP9     | high                    | 1.57 (0.86–2.85) | 0.14           |                  |                |
| Age               | per 10 years            | 1.17 (0.79–1.74) | 0.43           |                  |                |
| Sex               | Male                    | 1.41 (0.70–2.85) | 0.34           |                  |                |
| Child-Pugh score  | per 1                   | 1.41 (0.81–2.44) | 0.23           |                  |                |
| ALBI score        | per 1                   | 2.00 (0.98–4.07) | 0.06           | 1.25 (0.53–2.91) | 0.61           |
| AFP               | per 100 ng/ml           | 1.00 (1.00–1.00) | 0.30           |                  |                |
| Size of tumor     | per 1 cm                | 1.10 (1.03–1.16) | 0.003**        | 1.07 (1.00–1.15) | 0.056          |
| Number of tumors  | per 1                   | 1.69 (1.22–2.36) | 0.002**        | 1.46 (0.98–2.18) | 0.06           |
| Vascular invasion | with invasion           | 1.81 (0.99–3.32) | 0.054          | 1.11 (0.55–2.23) | 0.77           |
| Fibrosis          | cirrhosis               | 1.01 (0.51–1.99) | 0.98           |                  |                |
| BMI               | per 1 kg/m <sup>2</sup> | 1.02 (0.94–1.10) | 0.65           |                  |                |

**Table S5: List of antibodies used in this study.**

| Immunohistochemistry and Immunofluorescence Staining |         |                      |                              |          |
|------------------------------------------------------|---------|----------------------|------------------------------|----------|
| Antibody                                             | Species |                      | Source                       | Dilution |
| Anti-CD31                                            | Goat    | Polyclonal           | R&D Systems                  | 1/50     |
| Anti-AFP                                             | Mouse   | Monoclonal           | R&D Systems                  | 1/50     |
| Anti-CD68                                            | Rabbit  | Polyclonal           | Abcam                        | 1/200    |
| Anti-ICAM1                                           | Rabbit  | Mouse<br>Recombinant | Sino Biological              | 1/100    |
| Anti-ICAM1                                           | Rabbit  | Polyclonal           | Sigma                        | 1/300    |
| Anti-MMP9                                            | Mouse   | Monoclonal           | Santa Cruz Biotechnology     | 1/100    |
| Anti-eNOS                                            | Mouse   | Monoclonal           | BD Transduction laboratories | 1/100    |
| Western Blot Analysis                                |         |                      |                              |          |
| Anti-TNF- $\alpha$                                   | Rabbit  | Polyclonal           | Abcam                        | 1/1000   |
| Anti-pNF-kB                                          | Rabbit  | Monoclonal           | Cell Signaling Technology    | 1/1000   |
| Anti-tNF-kB                                          | Rabbit  | Monoclonal           | Cell Signaling Technology    | 1/1000   |
| Anti-ICAM1                                           | Goat    | Polyclonal           | R&D Systems                  | 1/1000   |
| Anti-MMP9                                            | Mouse   | Monoclonal           | Santa Cruz Biotechnology     | 1/500    |
| Anti-IL23                                            | Goat    | Polyclonal           | R&D Systems                  | 1/2000   |
| Anti-GAPDH (clone 6C5)                               | Mouse   | Monoclonal           | Millipore                    | 1/10000  |



**Table S6: List of primers used for quantitative RT-PCR.**

| Gene name      | Primer sequences                  |                                    |
|----------------|-----------------------------------|------------------------------------|
| mTNF- $\alpha$ | F: 5'-TCCCAGGTTCTCTTCAAGGGA-3'    | R: 5'-GGTGAGGAGCACGTAGTCGG-3'      |
| mMMP9          | F: 5'-CCCGCTGTATAGCTACCTCG-3'     | R: 5'-GTGGTTCAGTTGTGGTGGTG-3'      |
| mICAM1         | F: 5'-GTGATGCTCAGGTATCCATCCA-3'   | R: 5'-CACAGTTCTCAAAGCACAGCG-3'     |
| mCXCL1         | F: 5'-TGAGCTGCGCTGTCAGTGCCT-3'    | R: 5'-AGAAGCCAGCGTTCACCAGA-3'      |
| mCXCL2         | F: 5'-GAGCTTGAGTGTGACGCCCCCAGG-3' | R: 5'-GTTAGCCTTGCCTTTGTTCAGTATC-3' |
| mCXCL5         | F: 5'-GCATTTCTGTTGCTGTTACGCTG-3'  | R: 5'-CCTCCTTCTGGTTTTTCAGTTTAGC-3' |
| mCXCL10        | F: 5'-GTGCTGCCGTCATTTTCTG-3'      | R: 5'-CCCTATGGCCCTCATTCTCA-3'      |
| mIL23          | F: 5'-TGACCCACAAGGACTCAAG-3'      | R: 5'-AGCAGGCTCCCCTTGAA-3'         |
| mCFS1          | F: 5'-CCTTCTTCGACATGGCTGGG-3'     | R: 5'-TCATCCAGCTGTTCCCTGGTC-3'     |
| mGDF15         | F: 5'-GTGTGAGCATCCAGTCAT-3'       | R: 5'-GCTTTTGAAGTCTGCCCTCC-3'      |
| mMMP2          | F: 5'-CCAGCAAGTAGATGCTGCCT-3'     | R: 5'-GATGGCATTCCAGGAGTCTG-3'      |
| m18s           | F: 5'-CGGCTACCACATCCAAGGAA-3'     | R: 5'-ATTGGAGCTGGAATTACCGC-3'      |
| mGAPDH         | F: 5'-TGCACCACCAACTGCTTAG-3'      | R: 5'-GGATGCAGGATGATGTTC-3'        |
| hICAM1         | F: 5'-TTGGCATAGAGACCCCGTT-3'      | R: 5'-GCACATTGCTCAGTTCATACACC-3'   |

h and m indicate human and mouse cDNA-specific primer sequences, respectively.

## **Supplementary Data**

**Data S1: PL-SDA score plot using FPKM values for 13,525 genes.**

**Data S2: List of up-regulated genes in RNA-seq analysis.**

**Data S3: Gene list for up-regulated genes in LSECs co-culture used for Enrichr analysis.**
